# Supplementary material
Source: publisher site journal article supplement (https://www.dovepress.com/article/346724)
Supplement: Supplementary file 1 [file get_supplementary_file.php]

## Supplementary Materials for

### **Diversity of *glpK* gene and its effect on drug sensitivity in *Mycobacterium bovis***

Yuhui Dong<sup>1</sup>, Xichao Ou<sup>2</sup>, Chunfa Liu<sup>2</sup>, Weixing Fan<sup>3</sup>, Yanlin Zhao<sup>2</sup>, Xiangmei Zhou<sup>1</sup>

Corresponding author: Xiangmei Zhou; Email: [zhouxm@cau.edu.cn](mailto:zhouxm@cau.edu.cn).

#### **This PDF file includes:**

Supplementary Figure 1

Supplementary Figure 2

Supplementary Table 1

Supplementary Table 2

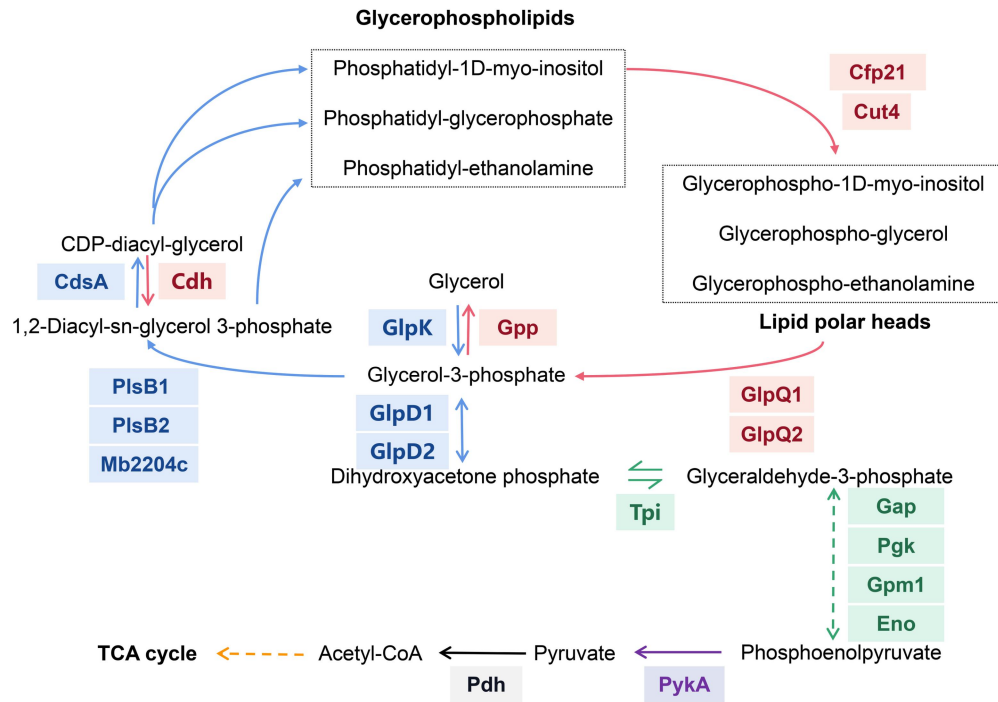

**Supplementary Figure 1 Glycerophospholipid recycling and glycerol metabolic pathways of *Mycobacterium bovis*.** Enzymes and their encoding genes are color coded to reflect their dedicated pathways: glycerophospholipid catabolism (red), glycerophospholipid anabolism (blue), glycolysis and gluconeogenesis (green), glycolysis (purple). Cdh, CDP-diacylglycerol pyrophosphatase; CdsA, phosphatidate cytidyltransferase; Cfp21, cutinase precursor; Cut4, cutinase precursor; Eno, enolase; Gap, glyceraldehyde 3-phosphate dehydrogenase; GlpD, glycerol-3-phosphate dehydrogenase; GlpK, glycerol kinase; GlpQ1, glycerophosphodiester phosphodiesterase; GlpQ2, glycerophosphodiester phosphodiesterase; Gpm1, 2,3-bisphosphoglycerate-dependent phosphoglycerate mutase; Gpp, glycerol phosphate phosphatase; Mb2204c, 1-acylglycerol-3-phosphate O-acyltransferase; Pdh, pyruvate dehydrogenase; Pgk, phosphoglycerate kinase; PlsB1, acyltransferase; PlsB2, glycerol-3-phosphate acyltransferase; PykA, pyruvate kinase; TCA cycle, tricarboxylic acid cycle; Tpi, triosephosphate isomerase.

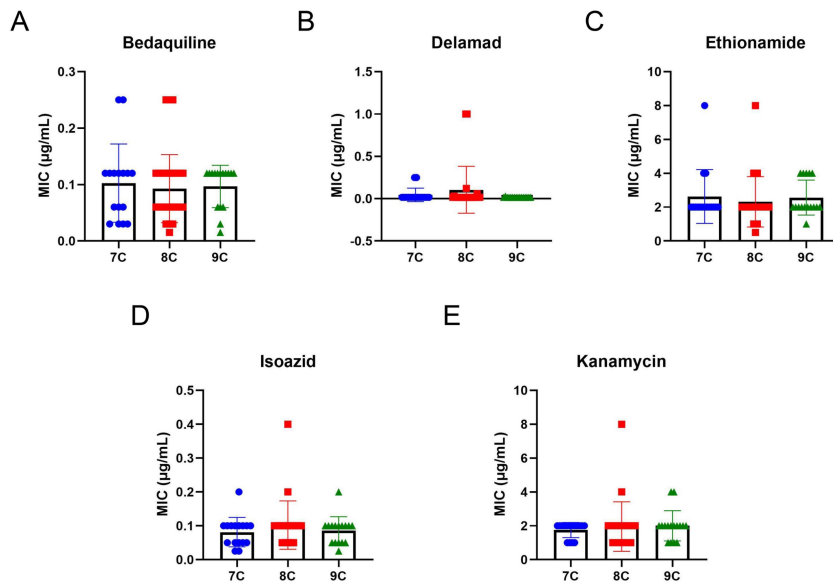

**Supplementary Figure 2 The *glpK* mutants had no significant difference in the sensitivity to five antibiotics.** (A-E) MIC was conducted for different *glpK* mutants of *M. bovis* isolates against (A) Bedaquiline, (B) Delamanid, (C) Ethionamide, (D) Isoniazid, and (E) Kanamycin. Significant differences of MIC were calculated by using unpaired t test (2 tailed).

**Supplementary Table 1 Minimal inhibitory concentration distribution (expressed in µg/mL, with respective cut-off points) of 14 drugs against clinical *Mycobacterium bovis* isolates from China.**

| Isolate | <i>GlpK</i> HT | AMK<br>(1.0) | BDQ<br>(0.25) | CFZ<br>(1.0) | DLM<br>(0.2) | EMB<br>(5.0) | ETH<br>(5.0) | INH<br>(0.2) |
|---------|----------------|--------------|---------------|--------------|--------------|--------------|--------------|--------------|
| B1      | 10C            | <=0.25       | 0.12          | 0.12         | <=0.015      | 1            | 2            | 0.05         |
| B2      | 10C            | 0.5          | 0.12          | 0.25         | <=0.015      | 1            | 2            | 0.05         |
| B3      | 11C            | <=0.25       | 0.06          | 0.12         | <=0.015      | 1            | 2            | 0.05         |
| B4      | 11C            | 0.5          | 0.12          | 0.5          | <=0.015      | 2            | 4            | 0.1          |
| B5      | 7C             | <=0.25       | 0.12          | 0.12         | <=0.015      | 1            | 2            | 0.05         |
| B6      | 7C             | <=0.25       | 0.25          | 0.12         | <=0.015      | 1            | 2            | 0.1          |
| B7      | 7C             | <=0.25       | 0.06          | 0.12         | <=0.015      | 1            | 2            | <=0.025      |
| B8      | 7C             | <=0.25       | 0.06          | 0.12         | <=0.015      | 1            | 2            | 0.1          |
| B9      | 7C             | <=0.25       | 0.12          | 0.25         | <=0.015      | 1            | 2            | 0.1          |
| B10     | 7C             | <=0.25       | 0.03          | 0.12         | <=0.015      | 1            | 2            | <=0.025      |
| B11     | 7C             | <=0.25       | 0.12          | 0.12         | <=0.015      | 1            | <b>8</b>     | 0.1          |
| B12     | 7C             | <=0.25       | 0.06          | 0.12         | <=0.015      | 1            | 2            | 0.05         |
| B13     | 7C             | <=0.25       | 0.25          | 0.25         | <b>0.25</b>  | 1            | 2            | 0.2          |
| B14     | 7C             | <=0.25       | 0.03          | <=0.06       | <=0.015      | 0.5          | 2            | 0.05         |
| B15     | 7C             | <=0.25       | 0.12          | 0.12         | <=0.015      | 1            | 2            | 0.1          |
| B16     | 7C             | <=0.25       | 0.12          | 0.12         | <=0.015      | 1            | 4            | 0.1          |
| B17     | 7C             | 0.5          | 0.12          | 0.25         | <b>0.25</b>  | 2            | 4            | 0.1          |
| B18     | 7C             | <=0.25       | 0.03          | <=0.06       | <=0.015      | 0.5          | 2            | 0.05         |
| B19     | 7C             | <=0.25       | 0.03          | <=0.06       | <=0.015      | 0.5          | 2            | 0.05         |
| B20     | 7C             | <=0.25       | 0.12          | <=0.06       | <=0.015      | 1            | 2            | 0.1          |
| B21     | 8C             | <=0.25       | 0.03          | <=0.06       | <=0.015      | 0.5          | 1            | 0.05         |
| B22     | 8C             | <=0.25       | 0.06          | 0.12         | <=0.015      | 1            | 2            | 0.1          |
| B23     | 8C             | <=0.25       | 0.12          | 0.25         | <=0.015      | 1            | 2            | 0.1          |
| B24     | 8C             | <=0.25       | 0.06          | 0.12         | <=0.015      | 1            | 2            | 0.05         |
| B25     | 8C             | <=0.25       | 0.06          | 0.12         | <=0.015      | 1            | 2            | 0.05         |
| B26     | 8C             | 0.5          | 0.12          | 0.5          | 0.12         | 1            | 2            | 0.1          |
| B27     | 8C             | <=0.25       | 0.12          | 0.12         | <=0.015      | 1            | 2            | 0.1          |
| B28     | 8C             | <=0.25       | 0.06          | 0.12         | <=0.015      | 1            | 2            | 0.1          |
| B29     | 8C             | <=0.25       | 0.12          | 0.12         | <=0.015      | 2            | <b>8</b>     | 0.1          |
| B30     | 8C             | 0.5          | 0.12          | 0.12         | <=0.015      | 1            | 4            | 0.1          |
| B31     | 8C             | <=0.25       | 0.12          | 0.25         | 0.06         | 1            | 2            | 0.1          |
| B32     | 8C             | <=0.25       | 0.06          | <=0.06       | <=0.015      | 0.5          | 2            | 0.05         |
| B33     | 8C             | <=0.25       | 0.12          | 0.25         | <=0.015      | 1            | 2            | 0.1          |
| B34     | 8C             | <=0.25       | <=0.015       | <=0.06       | 0.03         | 0.25         | 0.5          | 0.05         |
| B35     | 8C             | <=0.25       | 0.06          | <=0.06       | <=0.015      | 1            | 1            | 0.05         |

|                                         |                           |                      |                      |                      |                      |                      |                      |                      |
|-----------------------------------------|---------------------------|----------------------|----------------------|----------------------|----------------------|----------------------|----------------------|----------------------|
| B36                                     | 8C                        | <=0.25               | 0.12                 | <=0.06               | <=0.015              | 1                    | 2                    | 0.1                  |
| B37                                     | 8C                        | <=0.25               | 0.06                 | 0.25                 | <=0.015              | 2                    | 2                    | 0.2                  |
| B38                                     | 8C                        | 0.5                  | 0.25                 | 0.5                  | >1                   | 2                    | 2                    | 0.1                  |
| B39                                     | 8C                        | <=0.25               | 0.03                 | <=0.06               | <=0.015              | 0.25                 | 1                    | 0.05                 |
| B40                                     | 8C                        | <=0.25               | 0.06                 | <=0.06               | <=0.015              | 0.5                  | 2                    | 0.1                  |
| B41                                     | 8C                        | 0.5                  | 0.12                 | 0.5                  | <=0.015              | 1                    | 2                    | 0.1                  |
| B42                                     | 8C                        | 0.5                  | 0.25                 | 0.5                  | >1                   | 1                    | 4                    | <b>0.4</b>           |
| B43                                     | 8C                        | <=0.25               | 0.06                 | 0.12                 | <=0.015              | 1                    | 4                    | 0.1                  |
| B44                                     | 8C                        | 0.5                  | 0.03                 | 0.25                 | <=0.015              | 1                    | 2                    | 0.1                  |
| B45                                     | 9C                        | 0.5                  | 0.12                 | 0.25                 | <=0.015              | 2                    | 2                    | 0.05                 |
| B46                                     | 9C                        | <=0.25               | 0.12                 | 0.12                 | <=0.015              | 2                    | 4                    | 0.1                  |
| B47                                     | 9C                        | <=0.25               | <=0.015              | <=0.06               | <=0.015              | 1                    | 2                    | 0.05                 |
| B48                                     | 9C                        | 0.5                  | 0.12                 | 0.25                 | 0.03                 | 2                    | 4                    | 0.1                  |
| B49                                     | 9C                        | <=0.25               | 0.03                 | 0.12                 | <=0.015              | 0.25                 | 1                    | <=0.025              |
| B50                                     | 9C                        | 0.5                  | 0.12                 | 0.25                 | <=0.015              | 1                    | 4                    | 0.1                  |
| B51                                     | 9C                        | 0.5                  | 0.12                 | 0.12                 | <=0.015              | 2                    | 4                    | 0.1                  |
| B52                                     | 9C                        | 0.5                  | 0.12                 | 0.25                 | <=0.015              | 1                    | 2                    | 0.1                  |
| B53                                     | 9C                        | 0.5                  | 0.12                 | 0.25                 | <=0.015              | 2                    | 2                    | 0.1                  |
| B54                                     | 9C                        | <=0.25               | 0.12                 | 0.12                 | <=0.015              | 1                    | 2                    | 0.05                 |
| B55                                     | 9C                        | 0.5                  | 0.12                 | 0.25                 | <=0.015              | 2                    | 2                    | 0.1                  |
| B56                                     | 9C                        | 0.5                  | 0.06                 | 0.25                 | <=0.015              | 2                    | 2                    | 0.1                  |
| B57                                     | 9C                        | 0.5                  | 0.12                 | 1                    | <=0.015              | 1                    | 4                    | 0.2                  |
| B58                                     | 9C                        | <=0.25               | 0.06                 | 0.25                 | <=0.015              | 1                    | 2                    | 0.05                 |
| B59                                     | 9C                        | 0.5                  | 0.12                 | 0.25                 | <=0.015              | 1                    | 2                    | 0.1                  |
| B60                                     | 9C                        | <=0.25               | 0.06                 | 0.12                 | <=0.015              | 1                    | 2                    | 0.05                 |
| <b>Number of resistant isolates</b>     |                           | 0                    | 0                    | 0                    | 4                    | 0                    | 2                    | 1                    |
| <b>Proportion of resistant isolates</b> |                           | 0.00%                | 0.00%                | 0.00%                | 6.67%                | 0.00%                | 3.33%                | 1.67%                |
| <b>Isolate</b>                          | <b>Gl<sub>p</sub>K HT</b> | <b>KAN<br/>(2.5)</b> | <b>LEV<br/>(1.0)</b> | <b>LZD<br/>(1.0)</b> | <b>MXF<br/>(0.5)</b> | <b>PAS<br/>(4.0)</b> | <b>RFB<br/>(0.5)</b> | <b>RIF<br/>(1.0)</b> |
| B1                                      | 10C                       | 2                    | 0.5                  | 0.5                  | 0.5                  | 0.25                 | <=0.06               | 0.25                 |
| B2                                      | 10C                       | 2                    | 0.5                  | 0.5                  | 0.25                 | 0.25                 | <=0.06               | 0.25                 |
| B3                                      | 11C                       | 2                    | 0.5                  | 0.5                  | 0.25                 | 0.25                 | 0.12                 | 0.25                 |
| B4                                      | 11C                       | 2                    | 0.5                  | 0.5                  | 0.5                  | 1                    | 0.12                 | 0.25                 |
| B5                                      | 7C                        | 2                    | 0.25                 | 0.5                  | 0.25                 | 0.25                 | <=0.06               | 0.12                 |
| B6                                      | 7C                        | 2                    | 0.25                 | 0.5                  | 0.25                 | <=0.12               | <=0.06               | 0.12                 |
| B7                                      | 7C                        | 2                    | 0.25                 | 0.25                 | 0.12                 | <=0.12               | <=0.06               | <=0.06               |
| B8                                      | 7C                        | 2                    | 0.25                 | 0.25                 | 0.12                 | <=0.12               | <=0.06               | 0.25                 |
| B9                                      | 7C                        | 2                    | 0.25                 | 0.5                  | 0.25                 | 0.25                 | <=0.06               | 0.25                 |
| B10                                     | 7C                        | 2                    | 0.25                 | 0.25                 | 0.25                 | <=0.12               | <=0.06               | <=0.06               |
| B11                                     | 7C                        | <=1                  | 0.25                 | 0.5                  | 0.25                 | <=0.12               | <=0.06               | <=0.06               |
| B12                                     | 7C                        | <=1                  | 0.25                 | 0.25                 | 0.25                 | 0.25                 | 0.12                 | 0.25                 |
| B13                                     | 7C                        | 2                    | 0.5                  | 0.5                  | 0.5                  | 0.5                  | <=0.06               | 0.12                 |

|     |    |          |        |      |        |        |        |        |
|-----|----|----------|--------|------|--------|--------|--------|--------|
| B14 | 7C | <=1      | 0.25   | 0.25 | 0.12   | <=0.12 | <=0.06 | <=0.06 |
| B15 | 7C | 2        | 0.25   | 0.5  | 0.12   | <=0.12 | <=0.06 | <=0.06 |
| B16 | 7C | 2        | 0.5    | 0.5  | 0.25   | 1      | 0.12   | 0.25   |
| B17 | 7C | 2        | 0.5    | 0.5  | 0.5    | 1      | <=0.06 | 0.12   |
| B18 | 7C | <=1      | 0.25   | 0.25 | 0.12   | <=0.12 | <=0.06 | <=0.06 |
| B19 | 7C | 2        | 0.25   | 0.25 | 0.12   | <=0.12 | <=0.06 | <=0.06 |
| B20 | 7C | 2        | 0.25   | 0.25 | 0.25   | <=0.12 | <=0.06 | 0.25   |
| B21 | 8C | <=1      | <=0.12 | 0.12 | 0.12   | <=0.12 | <=0.06 | <=0.06 |
| B22 | 8C | 2        | 0.5    | 0.5  | 0.25   | 0.5    | <=0.06 | <=0.06 |
| B23 | 8C | <b>4</b> | 0.25   | 0.5  | 0.25   | 0.25   | <=0.06 | <=0.06 |
| B24 | 8C | 2        | 0.25   | 0.25 | 0.25   | <=0.12 | <=0.06 | <=0.06 |
| B25 | 8C | <=1      | 0.25   | 0.25 | 0.12   | <=0.12 | <=0.06 | <=0.06 |
| B26 | 8C | 2        | 0.5    | 1    | 0.5    | 0.5    | <=0.06 | <=0.06 |
| B27 | 8C | 2        | 0.5    | 0.5  | 0.25   | 0.5    | <=0.06 | 0.12   |
| B28 | 8C | <=1      | 0.5    | 0.5  | 0.5    | 0.25   | 0.12   | 0.5    |
| B29 | 8C | <=1      | 0.5    | 0.5  | 0.25   | 0.5    | <=0.06 | 0.12   |
| B30 | 8C | 2        | 0.5    | 0.5  | 0.25   | 2      | 0.12   | 0.25   |
| B31 | 8C | 2        | 0.5    | 0.5  | 0.25   | 0.5    | <=0.06 | <=0.06 |
| B32 | 8C | <=1      | 0.25   | 0.12 | 0.12   | <=0.12 | <=0.06 | 0.12   |
| B33 | 8C | 2        | 0.5    | 0.5  | 0.25   | 0.25   | 0.12   | 0.5    |
| B34 | 8C | <=1      | 0.25   | 0.06 | <=0.06 | <=0.12 | <=0.06 | <=0.06 |
| B35 | 8C | 2        | 0.25   | 0.25 | 0.12   | <=0.12 | <=0.06 | <=0.06 |
| B36 | 8C | 2        | 0.25   | 0.5  | 0.12   | <=0.12 | <=0.06 | <=0.06 |
| B37 | 8C | 2        | 0.5    | 0.5  | 0.25   | 0.5    | <=0.06 | 0.25   |
| B38 | 8C | <b>8</b> | 0.5    | 1    | 0.25   | 0.5    | <=0.06 | 0.12   |
| B39 | 8C | <=1      | 0.25   | 0.12 | <=0.06 | <=0.12 | <=0.06 | <=0.06 |
| B40 | 8C | <=1      | 0.25   | 0.25 | 0.12   | <=0.12 | <=0.06 | 0.12   |
| B41 | 8C | 2        | 0.5    | 0.5  | 0.5    | 1      | 0.25   | 0.5    |
| B42 | 8C | 2        | 0.5    | 1    | 0.25   | 1      | <=0.06 | 0.12   |
| B43 | 8C | <=1      | 0.25   | 0.5  | 0.12   | <=0.12 | <=0.06 | <=0.06 |
| B44 | 8C | 2        | 0.5    | 0.5  | 0.25   | <=0.12 | <=0.06 | 0.12   |
| B45 | 9C | 2        | 0.5    | 0.5  | 0.5    | 1      | 0.12   | 0.5    |
| B46 | 9C | <=1      | 0.5    | 0.5  | 0.5    | 0.25   | 0.12   | 0.25   |
| B47 | 9C | <=1      | 0.25   | 0.25 | 0.12   | <=0.12 | <=0.06 | 0.12   |
| B48 | 9C | <b>4</b> | 0.5    | 0.5  | 0.5    | 1      | 0.12   | 0.25   |
| B49 | 9C | <=1      | <=0.12 | 0.06 | <=0.06 | <=0.12 | <=0.06 | <=0.06 |
| B50 | 9C | 2        | 0.5    | 0.5  | 0.25   | 2      | <=0.06 | 0.12   |
| B51 | 9C | 2        | 0.5    | 0.5  | 0.25   | 1      | 0.12   | 0.25   |
| B52 | 9C | 2        | 0.5    | 1    | 0.5    | 2      | 0.5    | 0.5    |
| B53 | 9C | 2        | 0.5    | 1    | 0.5    | 2      | 0.12   | 0.25   |
| B54 | 9C | 2        | 0.25   | 0.5  | 0.25   | 0.25   | 0.12   | 0.25   |
| B55 | 9C | <b>4</b> | 0.5    | 1    | 0.5    | 1      | <=0.06 | 0.12   |
| B56 | 9C | 2        | 0.5    | 0.5  | 0.5    | 1      | 0.12   | 0.5    |

|                                         |    |       |       |       |       |       |        |       |
|-----------------------------------------|----|-------|-------|-------|-------|-------|--------|-------|
| B57                                     | 9C | <=1   | 0.5   | 1     | 0.5   | 2     | 0.25   | 1     |
| B58                                     | 9C | 2     | 0.25  | 0.5   | 0.12  | 0.5   | <=0.06 | 0.12  |
| B59                                     | 9C | 2     | 0.5   | 0.5   | 0.5   | 1     | 0.25   | 0.5   |
| B60                                     | 9C | 2     | 0.5   | 0.25  | 0.5   | 0.25  | 0.12   | 0.25  |
| <b>Number of resistant isolates</b>     |    | 4     | 0     | 0     | 0     | 0     | 0      | 0     |
| <b>Proportion of resistant isolates</b> |    | 6.67% | 0.00% | 0.00% | 0.00% | 0.00% | 0.00%  | 0.00% |

Bold lines show resistant strains.

**Supplementary Table 2 Analysis of drug-resistance gene mutations of *Mycobacterium bovis*.**

| Isolate | GlpK HT | Classification |     |     |     | Drug-resistance gene mutations       |          |
|---------|---------|----------------|-----|-----|-----|--------------------------------------|----------|
|         |         | DLM            | KAN | ETH | INH | Gene                                 | Mutation |
| B11     | 7C      | S              | S   | R   | S   | ethA                                 | –        |
| B13     | 7C      | R              | S   | S   | S   | fbiA, fbiB, fbiC, fgd, ddn           | –        |
| B17     | 7C      | R              | S   | S   | S   | fbiA, fbiB, fbiC, fgd, ddn           | –        |
| B23     | 8C      | S              | R   | S   | S   | eis, rrs                             | –        |
| B29     | 8C      | S              | S   | R   | S   | ethA                                 | –        |
| B38     | 8C      | R              | R   | S   | S   | fbiA, fbiB, fbiC, fgd, ddn, eis, rrs | –        |
| B42     | 8C      | R              | S   | S   | R   | fbiA, fbiB, fbiC, fgd, ddn, katG     | –        |
| B48     | 9C      | S              | R   | S   | S   | eis, rrs                             | –        |
| B55     | 9C      | S              | R   | S   | S   | eis, rrs                             | –        |
